# Supplementary material
Source: PubMed Central journal article supplement (PMC7271649)
Supplement: EMBR-21-e49708-s001.pdf [file EMBR-21-e49708-s001.pdf]

## APPENDIX TABLE OF CONTENT

| Appendix Table    | Page |
|-------------------|------|
| Appendix Table S1 | 2    |
| Appendix Table S2 | 3    |
| Appendix Table S3 | 4    |
| Appendix Table S4 | 5    |

## APPENDIX TABLE LEGENDS

**Appendix Table S1.** Antibodies used in Western Blot analysis.

**Appendix Table S2.** Antibodies used in Immunohistochemical Staining.

**Appendix Table S3.** Antibodies used in Immunofluorescence Staining.

**Appendix Table S4.** Primers used in qRT-PCR analysis.

**Appendix Table S1**

| Antibody                  | Company       | Reference | Specie | Dilution |
|---------------------------|---------------|-----------|--------|----------|
| Histone H3                | Abcam         | ab1791    | Rabbit | 1:5000   |
| IκBα                      | Abcam         | ab32518   | Rabbit | 1:1000   |
| SUMO2-3                   | Abcam         | ab81371   | Mouse  | 1:1000   |
| SUZ12                     | Abcam         | Ab12073   | Rabbit | 1:1000   |
| Tubulin-α (clone B-5-1-2) | Sigma Aldrich | T6074     | Mouse  | 1:10000  |

**Appendix Table S2**

| Antibody             | Company    | Reference        | Specie | Dilution | Retrieval        |
|----------------------|------------|------------------|--------|----------|------------------|
| $\beta$ -catenin     | Sigma      | c2206            | Rabbit | 1:500    | Tris-EDTA        |
| Ki67 (MM1)           | Novocastra | NCL-Ki67-<br>MM1 | Mouse  | 1:500    | Citrate 100°     |
| Lysozyme             | Dako       | A0099            | Rabbit | 1:4000   | Tris-EDTA        |
| P-IkB $\alpha$ (S36) | Abcam      | ab133462         | Rabbit | 1:1000   | Citrate<br>100°C |

**Appendix Table S3**

| Antibody                         | Company         | Reference    | Species | Dilution | Retrieval     |
|----------------------------------|-----------------|--------------|---------|----------|---------------|
| Bmi1 (D20B7)                     | Cell Signaling  | #6964        | Rabbit  | 1:200    | Citrate 100°C |
| CD44                             | Abcam           | ab65829      | Rabbit  | 1:100    | Citrate 100°C |
| EphB2                            | RD Systems      | AF467        | Goat    | 1:100    | Citrate 100°C |
| EZH2                             | Millipore       | 05-1319      | Mouse   | 1:500    | Citrate 100°C |
| GFP                              | Clontech        | 632593       | Rabbit  | 1:200    | Tris-EDTA     |
| Notch1 Cleaved (Val 1744)        | Cell Signaling  | #2421        | Rabbit  | 1:100    | Citrate 100°C |
| I $\kappa$ B $\alpha$ (C21)      | Santa Cruz      | sc-371       | Rabbit  | 1:100    | Citrate 100°C |
| Ki67 (MM1)                       | Novocastra      | NCL-Ki67-MM1 | Mouse   | 1:500    | Citrate 100°C |
| Lysozyme                         | Dako            | A0099        | Rabbit  | 1:4000   | Tris-EDTA     |
| NF- $\kappa$ B p65               | Abcam           | ab16502      | Rabbit  | 1:200    | Citrate 100°C |
| NF $\kappa$ B c-Rel N-ter.       | Abcam           | ab227519     | Rabbit  | 1:500    | Citrate 100°C |
| Olfm4 (D6Y5A) XP                 | Cell Signaling  | #39141       | Rabbit  | 1:400    | Citrate 100°C |
| P-I $\kappa$ B $\alpha$ (S32,36) | Cell Signalling | #9246        | Mouse   | 1:100    | Citrate 100°C |

**Appendix Table S4**

| Target       | Specie       | Forward                            | Reverse                            |
|--------------|--------------|------------------------------------|------------------------------------|
| A20          | Mouse        | GAGAGGCGGCAAAGAAT<br>CAAAC         | TGAACAGAAAAGGGCTG<br>GGTGC         |
| Alpi         | Mouse        | GCCTATCTCTGTGGGGTC<br>AA           | GGTCACCACTCCCACAGA<br>CT           |
| Ascl2        | Mouse        | GGTGA CTCTGGTGGACC<br>TA           | TCCGGAAGATGGAAGAT<br>GTC           |
| Bmi1         | Mouse        | TGTCCAGGTTCAAAAACC<br>A            | TGCAACTTCTCCTCGGTC<br>TT           |
| Car2         | Mouse        | CAATGCAGTGCTGAAAGG<br>AG           | CCCCATATTTGGTGTTC<br>AG            |
| Cd44         | Mouse        | AGCACCTTGGCCACCACT<br>CCT          | TGGGCCGAAGCAGTTGT<br>CCCT          |
| Chga         | Mouse        | CCAATACCCAATCACCAAC<br>C           | TTGTAGCCTGCATGGAAG<br>TG           |
| Cxcl10       | Mouse        | AGGAACCTCCAGTCTCAG<br>CA           | CAA AATTGGCTTGCAGGA<br>AT          |
| Dclk1        | Mouse        | CCCTGGGTTAATGATGAT<br>GG           | GGGAGTAGTCCTCCGATT<br>CC           |
| Fzd7         | Mouse        | GCTGCACCATCCTCTTCAT<br>G           | CGGCCAGATGAAAGTACT<br>GC           |
| <b>Hoxd1</b> | <b>Mouse</b> | <b>TGGCTCAGTGGTAAAGAG<br/>CA</b>   | <b>TTGTCCCCAGCCATCTAG<br/>TC</b>   |
| Ifna         | Mouse        | AGTGAGCTGACCCAGCAG<br>AT           | CAGGGGCTGTGTTTCTTC<br>TC           |
| Jag1         | Mouse        | GACCAGAACGGCAACAAA<br>ACTTGCATGGAA | TTGGTCTCACAGAGGCAC<br>TGCCAGGGTTCA |
| Lgr5         | Mouse        | CACCAGCTTACCCCATGA<br>CT           | CTCCTGCTCTAAGGCACC<br>AC           |
| Lrig1        | Mouse        | CCAAAAGCTGCATGAGTT<br>GA           | CCAAAAGCTGCATGAGTT<br>GA           |
| Ly6a         | Mouse        | CCCTTCTCTGAGGATGGA<br>CA           | TGGGACTCCATAGCACTG<br>GT           |
| Lyz1         | Mouse        | ATGGCGAACACAATGTCA<br>AA           | GCCCTGTTTCTGCTGAAG<br>TC           |
| Mex3a        | Mouse        | CTTCTCCTCTGCCTCCTCC<br>T           | TCAAAGCACACCATGCAG<br>TC           |
| Muc2         | Mouse        | ACGATGCCTACACCAAGG<br>TC           | TCTGCATGTTCCCAA ACT<br>CA          |
| Notch2       | Mouse        | TGTTACCTACCACAACGG<br>CAC          | ATGTTGGCAGCGTCCTG<br>GAATGTC       |
| Rfng         | Mouse        | ACACCAATTGCTCTGCTGT<br>G           | GGGTTACGTAGTTGTCA<br>TC            |
| Olfm4        | Mouse        | GCCAGATCTTGGCTCTGA<br>AG           | GCCAGTTGAGCTGAATCA<br>CA           |
| Tuft         | Mouse        | TGGGAAGACAGTCTCCTG<br>CT           | AGCTTTTTGGGCTGAGAC<br>AA           |
